# Supplementary material for: Roles of C-Terminal Region of Yeast and Human Rad52 in Rad51-Nucleoprotein Filament Formation and ssDNA Annealing
Source: PLoS One. 2016 Jun 30;11(6):e0158436. doi: 10.1371/journal.pone.0158436 (PMC4928909; doi:10.1371/journal.pone.0158436)
Supplement: S1 Fig — The regions corresponding to the Rad52NM are enclosed in a box. (PDF) [file pone.0158436.s001.pdf]

|        |     |                                                    |     |
|--------|-----|----------------------------------------------------|-----|
| yRad52 | 1   | ----MNEIMDMDEKKPVFGNHS-----EDIQTKLDKKLGP           | 32  |
|        |     | ... :..... .. ..  :  .. :..                        |     |
| hRad52 | 1   | MSGTEEAILGGRDShPAAGGGSVL CFGQCQYTAEEYQAIQKALRQRLGP | 50  |
| yRad52 | 33  | YISKRVGFGTSRIAYIEGWRVINLANQIFGYNGWSTEVKSVVIDFLDERQ | 82  |
|        |     | . :.. .....     .     :       :..... : : ...       |     |
| hRad52 | 51  | YISSRMAGGGQKVCYIEGHRVINLANEMFGYNGWAHSITQQNVDFVDLNN | 100 |
| yRad52 | 83  | GKFSIGCTAIVRVTLTSGTYREDIGYGTVENERRKPAAFERAKKSAVTD  | 132 |
|        |     | . :.. .. .. .. : : : .. .. .. : : .. .. .. ..      |     |
| hRad52 | 101 | GKFYVGVCAFVRVQLKDGSYHEDVGYGVSEGLKSKALSLEKARKEAVTDG | 150 |
| yRad52 | 133 | LKRSLRGFGNALGNCLYDKDFLAKIDKVKFD-PPDFDENNLFRPTDEIS- | 180 |
|        |     | : .. .. .. .. : .. : : : : : : : : : : : : : : :   |     |
| hRad52 | 151 | LKRALRSFGNALGNCLDKDYLRSLNKLPRLPLEVDLTAKRQDLEPSV    | 200 |
| yRad52 | 181 | ESSRTNTLHENQEQQQYPNKRRLTKVTNTNPDSTKNLVKIENTVSRGTP  | 230 |
|        |     | .: : : : : : : : : : : : : : : : : : : : : : : : : |     |
| hRad52 | 201 | EEARYNSCRPNM-ALGHP----QLQQVTSRPSHAVIPADQDCSSRSL    | 245 |
| yRad52 | 231 | MMAAPAEANSKNSSNKDLDKSLDASKQDQDDLDDSLMFSDDFQDDDLI   | 280 |
|        |     | .. :.. : : : : : : : : : : : : : : : : : : : : :   |     |
| hRad52 | 246 | SSAVESEATHQRK-----LRQKQLQQQFRERMEKQQVRVSTP-----    | 282 |
| yRad52 | 281 | NMGNTNSNVLTTEKD-----PVVAKQSPTASSNP--EAEQITFVTAK--  | 320 |
|        |     | :   ,  . :.. : : : : : : : : : : : : : : : : : :   |     |
| hRad52 | 283 | -----SAEKSEAAPPAPPVTHSTPVTVSEPLLEKDFLAGVTQELI      | 322 |
| yRad52 | 321 | -----AATSVQNERVIGEESIFDPKYQAQSIRHTVDQTTSKHIPA      | 360 |
|        |     | . : : : : : : : : : : : : : : : : : : : : : :      |     |
| hRad52 | 323 | KTLEDNSEKWAVTPDAGDGVVKPSSRADPAQTSDTLALNNQMVTQNRTPH | 372 |
| yRad52 | 361 | SVLKDKTM-----TT-----ARDSVYEKFAPKGKQL               | 386 |
|        |     | ... ..    : : : : : : : : : : : : : : : : : :      |     |
| hRad52 | 373 | SVCHQKPQAKSGSWDLQTYSDQRRTGNWESHRSQDMKKRKYDPS----   | 418 |
| yRad52 | 387 | SMKNNDKELGPHMLEGAGNQVPRETTPIKTNATAFPAPAAAPRFAPPSKV | 436 |
| hRad52 | 419 | -----                                              | 418 |
| yRad52 | 437 | HPNGNGAVPAVPQQRSTRREVGRPKINPLHARKPT 471            |     |

S1 Fig. Homologous alignment of yeast and human Rad52.
